# Supplementary material for: Intake and sources of added sugars among Australian children and adolescents
Source: Springer Nature journal article supplement (doi:10.1007/s00394-015-1041-8), 2015-09-16
Supplement: MOESM2 [file 8392438]

**Supplemental Table 2 –** Number of consumers for major added sugars contributing food groups by age groups

| Food groups# | All ages | | | 2-3 years | | | 4-8 years | | | 9-13 years | | | 14-16 years | | |
| --- | --- | --- | --- | --- | --- | --- | --- | --- | --- | --- | --- | --- | --- | --- | --- |
| Total | Boys | Girls | Total | Boys | Girls | Total | Boys | Girls | Total | Boys | Girls | Total | Boys | Girls |
| Sugar sweetened beverages | 3039 | 1588 | 1451 | 313 | 159 | 154 | 1026 | 530 | 496 | 1105 | 577 | 528 | 595 | 322 | 273 |
| Cakes, biscuits, pastries and batter-based products | 3647 | 1853 | 1794 | 494 | 257 | 237 | 1295 | 650 | 645 | 1209 | 610 | 599 | 649 | 336 | 313 |
| Chocolate and confectionary | 2337 | 1145 | 1192 | 270 | 141 | 129 | 873 | 437 | 436 | 788 | 384 | 404 | 406 | 183 | 223 |
| Sugar and sweet spreads | 2563 | 1343 | 1220 | 340 | 177 | 163 | 892 | 468 | 424 | 872 | 456 | 416 | 459 | 243 | 216 |
| Sweetened dairy products | 2078 | 1068 | 1009 | 357 | 184 | 173 | 808 | 418 | 390 | 588 | 300 | 288 | 325 | 167 | 158 |
| Bread and cereals | 4102 | 2106 | 1996 | 539 | 277 | 262 | 1436 | 733 | 703 | 1360 | 688 | 672 | 767 | 408 | 359 |
| Ice-cream and ice confection | 1761 | 881 | 880 | 166 | 85 | 81 | 664 | 330 | 334 | 646 | 321 | 325 | 285 | 146 | 139 |
| Other food sources | 4139 | 2119 | 2020 | 541 | 278 | 263 | 1443 | 733 | 710 | 1375 | 696 | 679 | 780 | 412 | 368 |

Data were weighted to account for over- or under-sampling to enable representation of the Australian population aged 2-16 years in terms of age group, gender and region.

#Food groups considered likely to contain added sugars include: sugar sweetened beverages (fruit drinks, cordial/mixer, soft drinks, energy drinks and other sweetened beverages); cakes, biscuits, pastries and batter-based products (sweet and savoury biscuits, cakes, buns, pastries, muffins and scones); sugar and sweet spreads (sugar, honey, jam, syrup and other sweet spreads); chocolate and confectionary (chocolate, chocolate-based confectionary and other confectionary); sweetened dairy products (flavoured or condensed milk, yogurt, frozen yoghurt and custard); bread and cereals (bread, breakfast cereal and bars); ice cream and ice confection (ice cream, frozen desserts and ice confection). All other food groups were grouped into “other food sources”.
